# Supplementary material for: Polytomy refinement for the correction of dubious duplications in gene trees
Source: PubMed Central journal article supplement — Bioinformatics. 2014 Aug 22;30(17):i519–26. doi: 10.1093/bioinformatics/btu463 (PMC4147916; doi:10.1093/bioinformatics/btu463), 2014-08-22
Supplement: supp_btu463_F_51_Supplementary_Fille.pdf [file supp_btu463_F_51_Supplementary_Fille.pdf]

## APPENDIX

**Proof of Theorem 1:** Let  $H$  be a minimum refinement of  $G$ . Then  $H$  is a binary arrangement of the  $n$  subtrees  $H_i$  for  $1 \leq i \leq n$ , where each  $H_i$  is a refinement of  $G_i$ . Suppose that for a given  $i$ ,  $H_i$  is not a minimum refinement of  $G_i$ . Then replacing  $H_i$  by  $H_{min}(G_i, S)$  lowers the number of NAD nodes in the subtree rooted at  $x_i$ , but has no effect on the type of nodes outside this subtree. It follows that a minimum refinement of  $G$  is a minimum refinement of  $G'$ .  $\square$

**Proof of Lemma 1:** Sufficiency is clearly true. As for necessity, let  $J$  be a join sequence with  $d$  NADs, and  $J_{i-1} = \{G_1, G_3\}$  be the first join of type AD or NAD in  $J$  followed by a join  $J_i = \{G_2, G_4\}$  of type S. We show that we can swap the join types of  $J_{i-1}$  and  $J_i$ . In other words, we create a new sequence  $J'$  where  $J'_k = J_k$  for  $k < i - 1$ ,  $J'_{i-1}$  is of type S,  $J'_i$  of the same type as  $J_{i-1}$ , and all subsequent joins types are the same as in  $J$ . We can then apply this swapping procedure until all S joins are in the beginning of  $J'$ .

Let  $G_{1,3}$  denotes the subtree created after applying  $J_{i-1}$ . If neither  $G_2$  nor  $G_4$  are equal to  $G_{1,3}$ , then we can safely swap  $J_{i-1}$  and  $J_i$  since they create two independent subtrees, which does not affect subsequent joins. So suppose w.l.o.g. that  $G_4 = G_{1,3}$ , and therefore  $J_i = \{G_{1,3}, G_2\}$ . Since  $J_i$  is of type S, then  $G_1$  and  $G_3$  both shared an S edge with  $G_2$  in  $\mathcal{F}(J, i-2)$ . Let  $J'_{i-1} = \{G_1, G_2\}$  be the join of type S, which creates a subtree denoted  $G_{1,2}$ , and let  $J'_i = \{G_{1,2}, G_3\}$ . If  $J_{i-1}$  is of type AD, then by applying Ruleset 1.1 (replacing  $T$  by  $G_3$ ), it follows that  $J'_i = \{G_{1,2}, G_3\}$  is of type AD. Conversely, if  $J_{i-1}$  is of type NAD, then by applying Ruleset 1.2, it follows that  $J'_i$  if of type NAD. In other words,  $J'_i$  and  $J_{i-1}$  are of the same type. Since the subtrees created by applying  $J_i$  and  $J'_i$  share the same leafset, and that join types are defined by the leaves, all subsequent joins in  $J$  can be applied in  $J'$ .  $\square$

**Proof of Theorem 2:** We first prove a simple claim.

*Claim i.* Consider  $H \in \mathcal{H}(G)$  with exactly  $d$  NADs. Then there exists a set  $W$  of vertex-disjoint cliques in  $R_S$  such that  $R_{AD} \cup W$  has  $d + 1$  connected components.

Recall that  $d$  is the minimum number of NADs attainable. Let  $J$  be a join sequence realizing  $H$ . By Lemma 1, we can assume that all speciations precede all duplications. Let  $k$  be the number of maximum speciation subtrees of  $H$ . As stated before (statement just preceding the theorem), the set of leaves of each speciation subtree of  $H$  forms a clique in  $R_S$ . Moreover, as the  $k$  maximum speciation subtrees of  $H$  are disjoint (do not share a common node), the corresponding set  $W$  of cliques in  $R_S$  are vertex-disjoint. Let  $R^J$  be the graph obtained after applying all the speciations in  $J$ . If  $R^J$  has more than  $d + 1$  AD-components, then  $J$  cannot lead to a solution with  $d$  NADs. Indeed, we have exhausted all speciations used by  $J$ , which implies only NAD edges are used to join AD-components together - requiring more than  $d$  of them if there are more than  $d + 1$  AD-components. On the other hand, if  $R^J$  has less than  $d + 1$  AD-components, then there exists a solution with less than  $d$  NADs, contradicting the fact that  $d$  is the minimum number of NADs of a solution to the MinNADref Problem. It follows that  $R^J$  has exactly  $d + 1$  AD-components, which completes the proof of the claim.

“ $\Leftarrow$ ” Let  $d + 1$  be the minimum number of connected components formed by the edges of  $R_{AD}$  augmented with the edges of a set  $W$  of vertex-disjoint cliques of  $R_S$ . Then all nodes of each connected component can be joined under a single subtree by applying joins of type AD and S. These  $d + 1$  subtrees can then be joined with exactly  $d$  NADs, yielding a refinement  $H$  with exactly  $d$  NADs. Then  $H$  is a solution to the MinNADref Problem as otherwise there is a refinement  $H^*$  with  $d^* < d$  NADs, leading (Claim i) to a  $W^*$  such that  $R_{AD} \cup W^*$  has  $d^* + 1 < d + 1$  connected components, which contradicts the fact that  $d + 1$  is the minimum number of connected components formed by the edges of  $R_{AD}$  augmented with the edges of a set of vertex-disjoint cliques in  $R_S$ .

“ $\Rightarrow$ ” Let  $H$  be a solution to the MinNADref Problem with  $d$  NADs. Then, by Claim i, there is a set  $W$  of vertex-disjoint cliques in  $R_S$  such that  $R_{AD} \cup W$  has  $d + 1$  connected components. Now suppose that the minimum number of connected components induced by a set of vertex-disjoint cliques is  $d^* + 1 < d + 1$ . By the sufficient proof above, it follows that  $d^*$  is the minimum number of NAD nodes of a resolution, contradicting the minimality of  $d$ .  $\square$

**Proof of Theorem 3:** In this proof, for two vertices  $G_i, G_j$  of  $R$ , we denote  $s_{i,j} = lca_S(s(G_i), s(G_j))$ .

“ $\Rightarrow$ ” Suppose  $R_S$  is not  $\{P_4, 2K_2\}$ -free. Let  $G_1, G_2, G_3, G_4$  be four vertices, with  $\{G_1, G_2\}$  and  $\{G_3, G_4\}$  being two edges in  $R_S$ , that form an induced  $P_4$  or  $2K_2$ . This implies that at least one of the two edges  $\{G_1, G_3\}$  and  $\{G_2, G_4\}$  should be absent from  $R_S$ .

Assume w.l.o.g. that  $\{G_1, G_3\}$  is the missing edge. The edge between  $G_1, G_2$  means that  $s(G_1)$  and  $s(G_2)$  are unrelated in  $S$ . Suppose w.l.o.g. that  $s(G_1)$  is in the left subtree of  $s_{1,2}$ , and  $s(G_2)$  in the right subtree. The missing edge between  $G_1$  and  $G_3$  then implies that  $s(G_1)$  and  $s(G_3)$  are related, in other words that  $s(G_3)$  is on the left subtree of  $s_{1,2}$  or is an ancestor of  $s_{1,2}$ .

Suppose that  $\{G_2, G_3\}$  is not an edge in  $R_S$ . Then, by a similar reasoning as before, it follows that  $s(G_3)$  is either on the right subtree of  $s_{1,2}$  or is an ancestor of  $s_{1,2}$ . It follows from the two arguments that  $s(G_3)$  is an ancestor of  $s_{1,2}$ . Now, the edge between  $G_3, G_4$  means that  $s(G_3)$  and  $s(G_4)$  are unrelated in  $S$ , and thus  $s(G_4)$  is unrelated to  $s(G_1)$  and  $s(G_2)$  as well. But in this case  $\{G_1, G_4\}$  and  $\{G_2, G_4\}$  should be edges in  $R_S$ , and thus  $G_1, G_2, G_3, G_4$  can neither form a  $2K_2$  nor a  $P_4$  structure.

Now suppose that  $\{G_2, G_3\}$  is an edge in  $R_S$ . Then  $G_1, G_2, G_3, G_4$  cannot form a  $2K_2$  structure, and for the four edges to form a  $P_4$  structure,  $\{G_2, G_4\}$  should not be an edge in  $R_S$ . By taking the same proof as above (switching  $G_3$  and  $G_4$ ), we have that  $s(G_4)$  is an ancestor of  $s_{1,2}$ . Now, the edge  $\{G_3, G_4\}$  means that  $s(G_3)$  and  $s(G_4)$  are unrelated in  $S$ , and thus  $s(G_3)$  is unrelated to  $s(G_1)$  and  $s(G_2)$  as well. But in this case  $\{G_1, G_3\}$  should be an edge in  $R_S$ , and thus  $G_1, G_2, G_3, G_4$  can neither form a  $2K_2$  nor a  $P_4$  structure.

In both cases, the evolutionary constraints on  $S$  edges in a valid graph lead to a contradiction with the assumption that  $R_S$  contains a  $P_4$  or a  $2K_2$ . So if  $R_S$  contains a  $P_4$  or a  $2K_2$ ,  $R$  is not valid.

“ $\Leftarrow$ ” The other direction of the proof uses the notion of cotrees, related to  $P_4$ -free graphs. A *cotree*  $T$  is a rooted tree in which the internal nodes are labelled 0 or 1 and have at least two children. We say  $T$  is an *alternating cotree* if the labels of any root-leaf path alternate between 0 and 1. A cotree  $T$  represents a given graph  $H$  if  $l(T) = V(H)$ , and  $xy \in E(H)$  if and only if  $lca_T(x, y)$  is

labelled by 1. It is well-known that for any  $P_4$ -free graph  $H$ , there is a unique alternating cotree that represents  $H$ . Let  $T$  denote the unique alternating cotree representing  $R_S$ . Note that  $l(T) = V(R)$ . The fact that  $R_S$  is also  $2K_2$ -free implies the following: any internal node  $x$  of  $T$  labelled 0 has at most one non-leaf child. If not, then  $x$  has two children  $x_1, x_2$  labelled 1, which implies we can find  $a, b \in l(x_1)$ ,  $c, d \in l(x_2)$  such that  $lca_T(a, b) = x_1$  and  $lca_T(c, d) = x_2$ . Since the  $lca$  of each pair  $(a, c)$ ,  $(a, d)$ ,  $(b, c)$  and  $(b, d)$  is  $x$ , labelled 0, then  $a, b, c, d$  induces a  $2K_2$  in which the edges are  $ab$  and  $cd$ .

Now, given  $R$  and  $T$ , we can construct a forest  $\mathcal{F}$  and a species tree  $\mathcal{S}$  that make  $R$  valid. Note that since  $T$  is constructed from  $R_S$ , for two leaves  $x, y$  of  $T$ ,  $lca_T(x, y)$  is labelled 1 if  $jt(x, y) = S$ , and labelled 0 if  $jt(x, y) \in \{AD, NAD\}$ . The reader may refer to Figure 1 for an example of the whole construction for a given  $R$ . The species tree is found by a transformation of  $T$ . Note that  $T$  is not necessarily binary, but the reader can verify that any binary refinement of the constructed species tree will result in a valid instance. Let  $x \in l(T)$ . We transform  $x$  into a bigger tree  $\beta(x) = (\beta_{AD}(x), (x^*, \beta_{NAD}(x)))$ , where  $x^*$  is a single leaf and  $\beta_{AD}(x)$  and  $\beta_{NAD}(x)$  are two copies of  $T$ . For some  $y \in l(T)$ , denote by  $\beta_{AD}(x, y)$  (resp.  $\beta_{NAD}(x, y)$ ) the unique leaf of  $\beta_{AD}(x)$  (resp.  $\beta_{NAD}(x)$ ) that corresponds to  $y$  in the copy.

The species tree  $\mathcal{S}$  is obtained by replacing each leaf  $x \in l(T)$  by  $\beta(x)$ . The point of  $\beta(x)$  is to reserve the  $\beta_{AD}(x)$  subtree for the vertices of  $R$  that  $x$  shares an AD relationship with, and the  $\beta_{NAD}(x)$  subtree for the NAD relationship. Hence in  $\mathcal{F}$ , both trees corresponding to  $x$  and  $y$  will have a gene mapped to  $\beta_{AD}(x, y)$  or to  $\beta_{AD}(y, x)$  when  $jt(x, y) = AD$ . If  $jt(x, y) = NAD$ , then either  $y$  but not  $x$  will have a gene mapped to  $\beta_{NAD}(x, y)$ , or  $x$  but not  $y$  will have a gene mapped to  $\beta_{NAD}(y, x)$ .

Denote by  $\beta_x$  the root of  $\beta(x)$ . Now on to the construction of  $\mathcal{F}$ . Let  $x \in l(T)$ . Let  $\gamma(x)$  be a copy of  $\beta(x)$  from which we remove the  $\beta_{NAD}(x)$  subtree (hence  $\gamma(x)$  is a copy of  $(\beta_{AD}(x), x^*)$ ). The species that each gene of  $\gamma(x)$  is mapped to is its corresponding leaf in  $\beta(x)$ . It follows from this that  $s(\gamma(x)) = \beta_x$ .

We finally construct  $\mathcal{F}$  by adding a subtree for each  $x \in l(T)$  as such :

- If the parent of  $x$  in  $T$  is labelled 1, add  $\gamma(x)$  to  $\mathcal{F}$ .
- If the parent of  $x$  in  $T$  is labelled 0, start from  $\gamma(x)$  and for each leaf  $y$  of  $T$  such that  $lca_T(x, y)$  is the parent of  $x$ ,
  - if  $jt(x, y) = AD$ , let  $\gamma(x) \leftarrow (y', \gamma(x))$ , where  $y'$  is a new gene such that  $s(y') = \beta_{AD}(y, x)$ .
  - if  $jt(x, y) = NAD$ , let  $\gamma(x) \leftarrow (y', \gamma(x))$ , where  $y'$  is a new gene such that  $s(y') = \beta_{NAD}(y, x)$ .

then add the resulting  $\gamma(x)$  to  $\mathcal{F}$ .

Note that from this, for  $x \in l(T)$ , if the parent of  $x$  is labelled 1 then  $s(\gamma(x)) = \beta_x$ , and if the parent of  $x$  is labelled 0, then  $s(\gamma(x))$  is the parent of  $\beta_x$ , which is labelled 0. To see this, denote by  $p(x)$  the parent of  $x$  in  $T$ , labelled 0. Observe that  $p(x)$  remains unchanged in  $\mathcal{S}$ . Now, for each  $y \in l(t)$  such that  $lca_T(x, y) = p(x)$ ,  $\gamma(x)$  has genes mapped to species of  $\beta(y)$ . Thus  $\gamma(x)$  has only genes mapped to species that are descendants of  $p(x)$  in  $\mathcal{S}$ , and thus  $s(\gamma(x)) = p(x)$  in  $\mathcal{S}$ .

In both cases,  $s(\gamma(x))$  is a descendant of its lowest ancestor labelled 1, if any. From this, we get that if  $x, y$  share an  $S$  edge in  $R$ , then they are left and right descendants of  $lca_T(x, y)$  labelled 1, implying that  $s(\gamma(x))$  and  $s(\gamma(y))$  are left and right descendants of this same node labelled 1 in  $\mathcal{S}$ . They are therefore related by speciation as prescribed. Now, suppose that  $x, y$  are related by a NAD edge. If  $lca_T(x, y)$  is  $p(x)$ , then  $\gamma(x)$  contains  $y'$  mapped to  $\beta_{NAD}(y, x)$ . This forces  $\gamma(x)$  and  $\gamma(y)$  to be related by duplication, which is of type NAD since by construction  $\gamma(x)$  and  $\gamma(y)$  contain no gene mapped to the same species. The same argument holds when  $lca_T(x, y)$  is  $p(y)$ . So suppose that  $lca_T(x, y)$  is not  $p(x)$  nor  $p(y)$ . Then  $lca_T(x, y) = lca_T(p(x), p(y))$  and is labelled 0. But this implies that  $lca_T(p(x), p(y))$  has at least two non-leaf children, one containing  $p(x)$  and the other containing  $p(y)$ , contradicting the  $2K_2$ -free assumption as stated above. We observe that the same applies to vertices  $x, y$  of  $R$  related by an AD edge, except that they must share a gene mapped to  $\beta_{AD}(y, x)$  or  $\beta_{AD}(x, y)$ , making them related by apparent duplication. We finally note that no other tree of  $\mathcal{F}$  has genes mapped to  $\beta_{AD}(y, x)$  or  $\beta_{AD}(x, y)$ , thereby removing the possibility of an unwanted apparent duplication.  $\square$

Before being able to prove Theorem 4, we need the following general property on  $P_4$ -free graphs.

LEMMA 1. *Let  $\{x, y\}$  be an edge of a  $P_4$ -free graph  $\mathcal{G}$ , and let  $W_x$  and  $W_y$  be two vertex-disjoint cliques of  $\mathcal{G}$  respectively containing  $x$  and  $y$ . Then we can partition the vertices  $V(W_x) \cup V(W_y)$  into at most two other cliques, with one containing  $\{x, y\}$ .*

PROOF. If the set  $V(W_x) \cup V(W_y)$  induces a single clique, then we are done. Otherwise, let  $Y(x) \subseteq V(W_y)$  denote the set of vertices in  $W_y$  that share an edge with  $x$  (including  $y$ ), and let  $X(y) \subseteq V(W_x)$  be the vertices of  $W_x$  that share an edge with every vertex of  $Y(x)$ . The set  $V_1 = \{x\} \cup Y(x) \cup X(y)$  induces a clique containing  $\{x, y\}$ . Now, let  $a$  and  $b$  be two vertices sharing an edge of  $W_x$  and  $W_y$  respectively with  $x$  and  $y$ , such that  $a, b \notin V_1$ . If  $a, b$  are both in  $W_x$ , or both in  $W_y$ , then they obviously share an edge. Otherwise, suppose w.l.o.g. that  $a$  is in  $W_x$  and  $b$  is in  $W_y$ . Because  $a \notin X(y)$ , there is some  $b_i \in Y(x)$  such that  $\{a, b_i\} \notin E(\mathcal{G})$ . And because  $b \notin Y(x)$ ,  $\{x, b\} \notin E(\mathcal{G})$ . But  $\{a, x, b_i, b\}$  induces a  $P_4$ , unless  $ab \in E(\mathcal{G})$ . Therefore, every pair of vertices in  $W_x$  or  $W_y$  but not in  $V_1$  share an edge, forming our second clique.

If  $Y(x)$  is empty, we can apply the same argument by symmetry using  $X(y)$  and  $Y(x)$  if  $X(y)$  is not empty. If both  $Y(x)$  and  $X(y)$  are empty, then let  $V_1 = \{x, y\}$  induce the first clique. Let  $a, b$  be vertices sharing edges with  $x$  and  $y$  respectively. Now,  $a, x, y, b$  induce a  $P_4$  unless  $\{a, b\} \in E(\mathcal{G})$ , and thus second clique is formed by the vertices sharing an edge with  $x, y$ .  $\square$

Let  $c_{AD}$  be the number of AD-components of  $R$  before applying any join. Suppose we have a join sequence with  $s$  useful speciations, all applied before any AD or NAD join. It follows that applying a useful speciation connects two AD-components together, and applying  $s$  of them results in a graph with  $AD_{AD} - s$  AD-components, from which we can obtain a tree with  $d = AD_{AD} - s - 1$  NADs. It is then clear that there exists a solution with  $d$  NADs iff there exists a join sequence with  $s = AD_{AD} - d - 1$  useful speciations. Hence we can minimize the number of NADs by maximizing the number of useful speciations we can make. Our

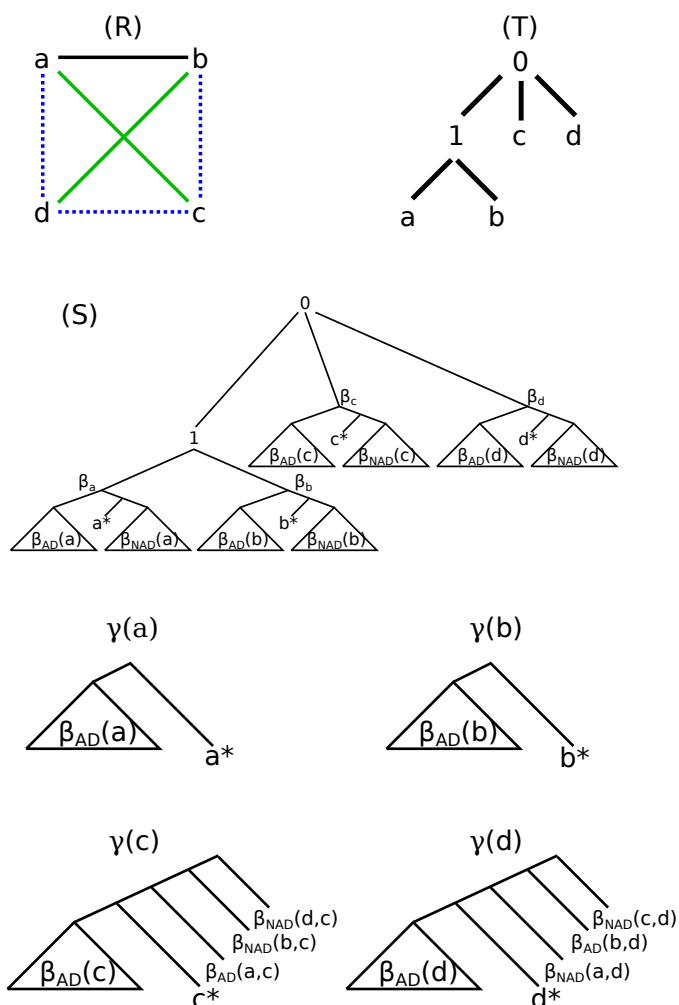

**Fig. 1.** A construction of  $\mathcal{F}$  and  $\mathcal{S}$  given  $R$ . The solid black edge of  $R$  is an  $S$ -edge, the green edges are AD-edges and the blue dotted edges are NAD-edges.  $T$  is the cotree corresponding to  $R_S$ , where  $V(R) = \mathcal{U}(T)$ . The species tree  $\mathcal{S}$  is built by replacing each leaf  $x$  of  $T$  by  $\beta(x)$ . For instance here,  $\beta_{AD}(a)$  contains the leaves  $\{\beta_{AD}(a, a), \beta_{AD}(a, b), \beta_{AD}(a, c), \beta_{AD}(a, d)\}$ . The gene tree forest  $\mathcal{F}$  consists of  $\{\gamma(a), \gamma(b), \gamma(c), \gamma(d)\}$ , in which we labelled the genes to their corresponding species, built from the construction given in the proof of Theorem 3.

heuristic consists in constructing a join sequence by always picking the lowest available speciation, which is shown to find at least half the number of useful speciations as the optimal solution. We first need the following property.

**LEMMA 2.** *Let  $\{x, y\}$  be an  $S$  edge of  $R$  corresponding to a lowest available speciation, and let  $d$  be number of NADs of a solution to the MinNADref problem. Then there exists a solution which makes the  $\{x, y\}$  speciation that has at most  $d + 1$  NADs.*

**PROOF.** Let  $W$  be a set of vertex-disjoint cliques of  $R_S$ , and let  $R_W$  be the  $R$  graph restricted to the set of edges  $W \cup R_{AD}$  ( $W$  must exist by Theorem 3).  $R_W$  has  $d + 1$  connected components. Let  $W_x$  (resp.  $W_y$ ) be the clique of  $W$  that contains  $x$  (resp.  $y$ ). If

$W_x = W_y$ , then we are done. Otherwise, by Lemma 1, we can partition the vertices of  $W_x$  and  $W_y$  into two other cliques, namely  $W_1$  containing the  $xy$  edge and the other clique  $W_2$ . Let  $W' = W \setminus \{W_x, W_y\} \cup \{W_1, W_2\}$ . Now,  $W'$  is another set of vertex-disjoint cliques. Denote by  $R_{W'}$  the graph  $R$  restricted to  $W' \cup R_{AD}$ . Denote by  $Z_x, Z_y$  the vertices in  $V(R) \setminus \{W_x, W_y\}$  in the same  $R_W$  component as  $x$  and  $y$  respectively. Similarly, let  $Z_1, Z_2$  be the vertices in  $V(R) \setminus \{W_1, W_2\}$  in the same  $R_{W'}$  component as a vertex of  $W_1$  and a vertex of  $W_2$  respectively. We have that  $Z_x \cup Z_y = Z_1 \cup Z_2$ . If  $x, y$  were in two distinct components  $W_x \cup Z_x$  and  $W_y \cup Z_y$  in  $R_W$ , then  $R_{W'}$  also has  $d + 1$  components, as these two components got replaced by  $W_1 \cup Z_1$  and  $W_2 \cup Z_2$ . If  $x, y$  were in the same component, at worst  $R_{W'}$  has  $d + 2$  components, having the  $x, y$  component replaced by  $W_1 \cup Z_1$  and  $W_2 \cup Z_2$ .  $\square$

We are now ready to prove Theorem 4:

**Proof of Theorem 4:** Let  $d = AD_{AD} - s - 1$  be the minimum number of NADs in an optimal solution, and let  $xy$  be the lowest useful speciation available in  $R$ . Note that  $s = AD_{AD} - d - 1$ . By Lemma 2, there exists a solution with  $d + 1$  NADs that contains the  $xy$  speciation. Let  $R'$  be the graph obtained after applying the  $\{x, y\}$  join, thus contracting  $x$  and  $y$  and applying Ruleset 1. Since  $xy$  is the lowest speciation, any common neighbor of  $x$  and  $y$  in  $R_S$  is a neighbor of the  $xy$  vertex in  $R'_S$ . Therefore,  $R'_S$  has  $AD_{AD} - 1$  AD-components and admits an optimal solution with at most  $d$  NADs. Hence, the number of useful speciations we can make given  $R'$  is at least  $s' = AD_{AD} - 1 - d - 1 = s - 2$ . It then follows that after applying the first  $k$  lowest speciations, we have a solution with at least  $s - 2k$  more useful speciations, which implies that  $k$  can be at least as big as  $s/2$  if  $s$  is even. If  $s$  is odd,  $k$  can be as high as  $(s - 1)/2$ , and there is at least one useful speciation available, hence the lower bound of  $\lceil s/2 \rceil$ .  $\square$

**Proof of Theorem 5:** First, we can notice that by including the bridges into  $M$ , we ensure that all other added edges are useful speciation edges.

Now, we prove the maximality of the useful matching by induction on  $|X \cup Y|$ . Given  $P = (X, Y, AD_X, AD_Y, B)$ , denote by  $M_P$  the solution returned by Algorithm 2, and by  $OPT_P$  a useful matching of maximum size over instance  $P$ .

If  $|X \cup Y| = 1$ , then the theorem trivially holds, since each useful matching of  $P$  contains no edge. Assume the theorem holds for  $|X \cup Y| = k$ , we show that it holds for  $|X \cup Y| = k + 1$ .

Let  $\alpha \in X \cup Y$  be the last vertex added to  $D$  by Algorithm 2, and assume w.l.o.g that  $\alpha \in X$ . Write  $X' = X \setminus \{\alpha\}$ , and  $P'$  the instance obtained from  $P$  by removing  $\alpha$ . By induction, since  $|X' \cup Y| = k$ ,  $|M_{P'}| = |OPT_{P'}|$ . Moreover, by construction,  $M_{P'}$  is exactly  $M_P$  minus the edge of  $M_P$  incident to  $\alpha$ , if any.

Assume that  $\alpha$  is incident to an edge of  $M_P$ . It holds that  $|M_P| = |M_{P'}| + 1 = |OPT_{P'}| + 1$ . On the other hand, remove from  $OPT_P$  the edge incident to  $\alpha$ , if any. Then the edges left in  $OPT_P$  form a useful matching of  $P'$ , and thus  $|OPT_{P'}| \geq |OPT_P| - 1$ . As it has been shown that  $|M_P| = |OPT_{P'}| + 1$ , it follows that  $|M_P| \geq |OPT_P|$ , and thus  $M_P$  is a useful matching of  $P$  of maximum size.

Now, assume that  $\alpha$  is not incident to an edge of  $M_P$ . Denote by  $c(\alpha)$  the connected component of  $\mathcal{G}_{P, M_P}$  that contains  $\alpha$ .

*Claim i.* Each vertex  $\beta$  in  $Y \setminus c(\alpha)$  is incident to an edge in  $M_P$ .

If the claim was wrong, the algorithm would have added an edge between  $\alpha$  and  $\beta$ . If, in addition, each vertex of  $Y \cap c(\alpha)$  is incident

to an edge of  $M_P$ , then each vertex of  $Y$  is incident to an edge of  $M_P$ , implying that  $M_P$  is of maximum size, which completes the proof. Hence assume that there exists at least one vertex  $\beta$  of  $Y \cap c(\alpha)$  such that  $\beta$  is not incident to any edge of  $M_P$ .

*Claim ii.* Each vertex  $\gamma$  in  $X \setminus c(\alpha)$  must be incident to an edge of  $M_P$  (statement ii).

Again, the proof is immediate: if the claim was wrong, the algorithm would have defined an edge from  $\beta$  to  $\gamma$ .

Now, consider the set  $AD_{\setminus\alpha} = AD_{X \setminus c(\alpha)} \cup AD_{Y \setminus c(\alpha)}$  of AD-components on the sets of vertices  $(X \setminus c(\alpha)) \cup (Y \setminus c(\alpha))$ . By definition of useful speciation edges, the graph defined by the vertex set  $AD_{\setminus\alpha}$  and the edge set containing one edge for each pair  $(AD_{X_i} \in AD_{X \setminus c(\alpha)}, AD_{Y_j} \in AD_{Y \setminus c(\alpha)})$  of linked components has no cycles, and thus at least one vertex (AD-component) of degree less than 2. Each such AD-component reduces to a single vertex as otherwise there would be a vertex of this AD-component not incident to any edge of  $M_P$ , which is in contradiction with Claim ii. Hence, as  $\alpha$  is the last vertex added to  $D$  and the algorithm proceeds in decreasing order of AD-component cardinality, the AD-component containing  $\alpha$  in  $X$  should be of cardinality one, meaning that  $x$  is an isolated vertex. Hence  $Y \cap c(\alpha) = \emptyset$ , and with Claim i it follows that each vertex of  $Y$  is adjacent to an edge of  $M_P$ , and thus  $M_P$  has maximum size.  $\square$

**LEMMA 3.** *Let  $P = (X, Y, AD_X, AD_Y, B)$  and  $P' = (X', Y', AD_{X'}, AD_{Y'}, B')$  be two instances such that  $|X'| = |X|$ ,  $|Y'| = |Y|$ ,  $|AD_{X'}| = |AD_X|$ ,  $|AD_{Y'}| = |AD_Y|$  and  $|B| = |B'|$ . Then  $P$  and  $P'$  admit maximum useful matchings of the same size.*

**Proof of Lemma 3:** Consider two maximum useful matchings  $M$ ,  $M'$  of  $P$ ,  $P'$  respectively and the induced graphs  $\mathcal{G}_{P,M}$ ,  $\mathcal{G}_{P',M'}$ . Assume w.l.o.g. that  $|M| > |M'|$ .

• *Claim (i):* Since  $|X'| = |X|$ ,  $|Y'| = |Y|$  and  $|AD_{X'}| = |AD_X|$ , it follows that  $\mathcal{G}_{P,M}$  contains strictly less connected components than  $\mathcal{G}_{P',M'}$ .

• *Claim (ii)* Since  $|M| > |M'|$ , it follows that there exists a node  $x$  of  $X'$  and a node  $y$  of  $Y'$  that are not incident to an edge of  $M'$ . Then one of the two following cases hold.

*Case 1:*  $x$  and  $y$  belong to different components of  $\mathcal{G}_{P',M'}$ . Then it holds that  $M'$  is not a maximum useful matching, since we can add edge  $\{x, y\}$  to  $M'$ , thus contradicting the assumption that  $M'$  is a maximum useful matching of  $P'$ .

*Case 2:*  $x$  and  $y$  belong to the same connected component  $c(x)$  of  $\mathcal{G}_{P',M'}$ . We show that we can compute a useful matching  $M^*$  of  $P'$ , such that  $|M^*(P')| > |M(P')|$ . First, we show that there exist two nodes  $x_1 \in X'$  and  $y_1 \in Y'$  that belong to a connected component of  $\mathcal{G}_{P',M'}$  different from  $c(x)$  such that  $\{x_1, y_1\}$  is an edge of  $M'$ . Notice that if  $x_1$  and  $y_1$  do not exist, then one of the following two cases holds: (2.1) There exists a single connected component in  $\mathcal{G}_{P',M'}$ , but this violates *Claim (i)*; (2) Each connected component of  $\mathcal{G}_{P',M'}$  different from  $c(x)$  contains only bridges, which implies that there exist two nodes of  $\mathcal{G}_{P',M'}$  (one of  $x$ ,  $y$  and a node that belongs to  $(AD_{X'} \cup AD_{Y'}) \setminus c(x)$ ) not incident to an edge of  $M'$  and belonging to different components of  $\mathcal{G}_{P',M'}$ . But then we fall in *Case 1*. and  $M'$  is not a maximum useful matching of  $P'$ . Thus nodes  $x_1$  and  $y_1$  exist, so we can compute a useful matching  $M^*$  of  $P'$  starting from  $M'$  as follows: remove  $\{x_1, y_1\}$  from  $M'$  and

add edges  $\{x, y_1\}$ ,  $\{x_1, y\}$  to  $M^*$ . It follows that  $M^*$  is a useful matching for  $P'$  with  $|M^*| > |M'|$ , contradicting the assumption that  $M'$  is a maximum useful matching of  $P'$ .  $\square$

**LEMMA 4.** *Let  $P = (X, Y, AD_X, AD_Y, B = \emptyset)$  and  $P' = (X', Y, AD'_{X'}, AD_Y, B' = \emptyset)$  be two instances such that  $|X'| - |X| = |AD'_{X'}| - |AD_X|$  with  $|X'| \geq |X|$ . If  $P'$  admits a useful matching  $M'$ , then  $P$  admits a useful matching  $M$  such that  $|M| \geq |M'| - (|X'| - |X|)$ .*

**Proof of Lemma 4:** Let  $x_1, x_2$  be two nodes of  $X'$  in two distinct components of  $AD'_{X'}$ . If we join the trees corresponding to  $x_1$  and  $x_2$ , leading to a single node  $x_{1,2}$ , we create a new instance  $P^* = (X^*, Y, AD^*_X, AD_Y, \emptyset)$ , in which  $|X^*| = |X'| - 1$  and  $|AD^*_X| = |AD'_{X'}| - 1$ . If  $x_1$  and  $x_2$  are incident to edges in  $M'$ , say  $\{x_1, y\}$  and  $\{x_2, z\}$ , then  $M^* = M' \setminus \{\{x_1, y\}, \{x_2, z\}\} \cup \{x_{1,2}, z\}$  is a useful matching for  $P^*$ . Otherwise, if  $x_1$  or  $x_2$  is not incident to an edge of  $M'$ , then construct a matching  $M^*$  of  $P^*$  from  $M'$  by removing the edge incident to  $x_1$  or  $x_2$ , if any. In all cases,  $|M^*| \geq |M'| - 1$ . By applying such join operation  $|X'| - |X|$  times, we obtain an instance  $P^*$  with  $|X|$  nodes and  $|AD_X|$  components and a useful matching  $M^*$  verifying  $|M^*| \geq |M'| - (|X'| - |X|)$ . By Lemma 3, it follows that  $P$  admits a useful matching  $M$  of the same size, which concludes the proof.  $\square$

**Proof of Theorem 6:** Let  $\mathcal{F}$  be the input forest of Algorithm 1. Let  $\mathcal{F}(s)$  be the subset of  $\mathcal{F}$  containing the trees  $G$  such that  $s(G)$  is  $s$  or one of its descendants. Let  $n_s$  be the total number of useful speciations performed on trees of  $\mathcal{F}(s)$  at step  $s$  of the algorithm, i.e., after considering node  $s$ . We show by induction on the height of  $s$  that  $n_s$  is the maximum number of useful speciations that can be chosen on the trees of  $\mathcal{F}(s)$ , which proves the theorem as  $s$  can be the root of  $\mathcal{S}$ . This is trivially true if  $s$  is a leaf. So let  $s$  be an internal node of  $\mathcal{S}$  with children  $x$  and  $y$ . Let  $P = (X, Y, AD_X, AD_Y, B = \emptyset)$  be the instance corresponding to  $s$ . Let  $|M_P|$  be the number of useful speciations performed by the algorithm for  $P$ . Then  $n_s = |M_P| + n_x + n_y$ .

Suppose we can make another choice of  $n'_x$  and  $n'_y$  useful speciations on  $\mathcal{F}(x)$  and  $\mathcal{F}(y)$  respectively, yielding a different instance  $P' = (X', Y', AD'_{X'}, AD'_{Y'}, B' = \emptyset)$  for  $s$ . Suppose also that  $P'$  admits  $|M_{P'}|$  useful speciations such that  $n'_s = |M_{P'}| + n'_x + n'_y > |M_P| + n_x + n_y = n_s$ . Note that by induction,  $n_x \geq n'_x$  and  $n_y \geq n'_y$ , and thus we should have  $|M_{P'}| > |M_P|$ . Any of the  $n'_x$  speciations has the effect of merging two nodes potentially in  $X$ , and merging two components potentially in  $AD_X$ . Now  $|X| = |\mathcal{F}(x)| - n_x$ . If  $|AD_R|$  is the number of AD-components of  $R$  before any speciation, then  $|AD_X| = |AD_R| - n_x$ . Similarly  $|X'| = |\mathcal{F}(x)| - n'_x$  and  $|AD'_{X'}| = |AD_R| - n'_x$ . This leads to  $n_x - n'_x = |X'| - |X| = |AD'_{X'}| - |AD_X|$ . In the same manner,  $n_y - n'_y = |Y'| - |Y| = |AD'_{Y'}| - |AD_Y|$ . From this,  $n'_s > n_s \Rightarrow n'_s - n_s > n_x - n'_x + n_y - n'_y = |X'| - |X| + |Y'| - |Y|$ . But we can also deduce from Lemma 4 that  $n'_s - n_s \leq |X'| - |X| + |Y'| - |Y|$ : a contradiction.  $\square$

**Proof of Corollary 1:** A bridge is created between two AD-components  $AD_X$ ,  $AD_Y$  if and only if there exist two vertices  $x \in AD_X$  and  $y \in AD_Y$  such that  $\{x, y\}$  is an  $S$  edge in  $R$  and  $x$  and  $y$  belong to the same AD-component in  $R$ . It follows that for a pair

$(\mathcal{F}, S)$  leading to a graph  $R$  where AD-components are free from  $S$  edges, we are guaranteed that for every node  $s$  of  $S$  the instance  $P$  corresponding to  $s$  has no bridges. It follows from Theorem 6 that Algorithm 1 finds a maximum set  $M$  of useful speciations, i.e., a set of useful speciations leading to the minimum number  $ad$  of AD-components, and to a refinement  $H$  with  $ad - 1$  NADs. Suppose  $H$  is not optimal, i.e., there is an  $H'$  with  $ad' < ad - 1$  NADs. By Lemma 1, we can assume that the join sequences  $J'$  leading to  $H'$

has all  $M'$  joins of type  $S$  first, followed by AD and NAD joins. As  $M$  is a maximum set of useful speciations, we have  $|M'| \leq M$ . If  $M' < M$ , then after applying the  $M'$  speciations, the graph is left with  $ad' > ad - 1$  AD-components, requiring more than  $ad - 1$  NADs, contradicting the hypothesis. Therefore  $H$  is a solution to the MinNADref problem.  $\square$
